# Supplementary material for: T‐cell response after first dose of BNT162b2 SARS‐CoV‐2 vaccine among healthcare workers with previous infection or cross‐reactive immunity
Source: PubMed Central journal article supplement — Clin Transl Immunology. 2021 Sep 8;10(9):e1341. doi: 10.1002/cti2.1341 (PMC8426108; doi:10.1002/cti2.1341), 2021-09-08
Supplement: CTI2-10-e1341-s001.pdf [file CTI2-10-e1341-s001.pdf]

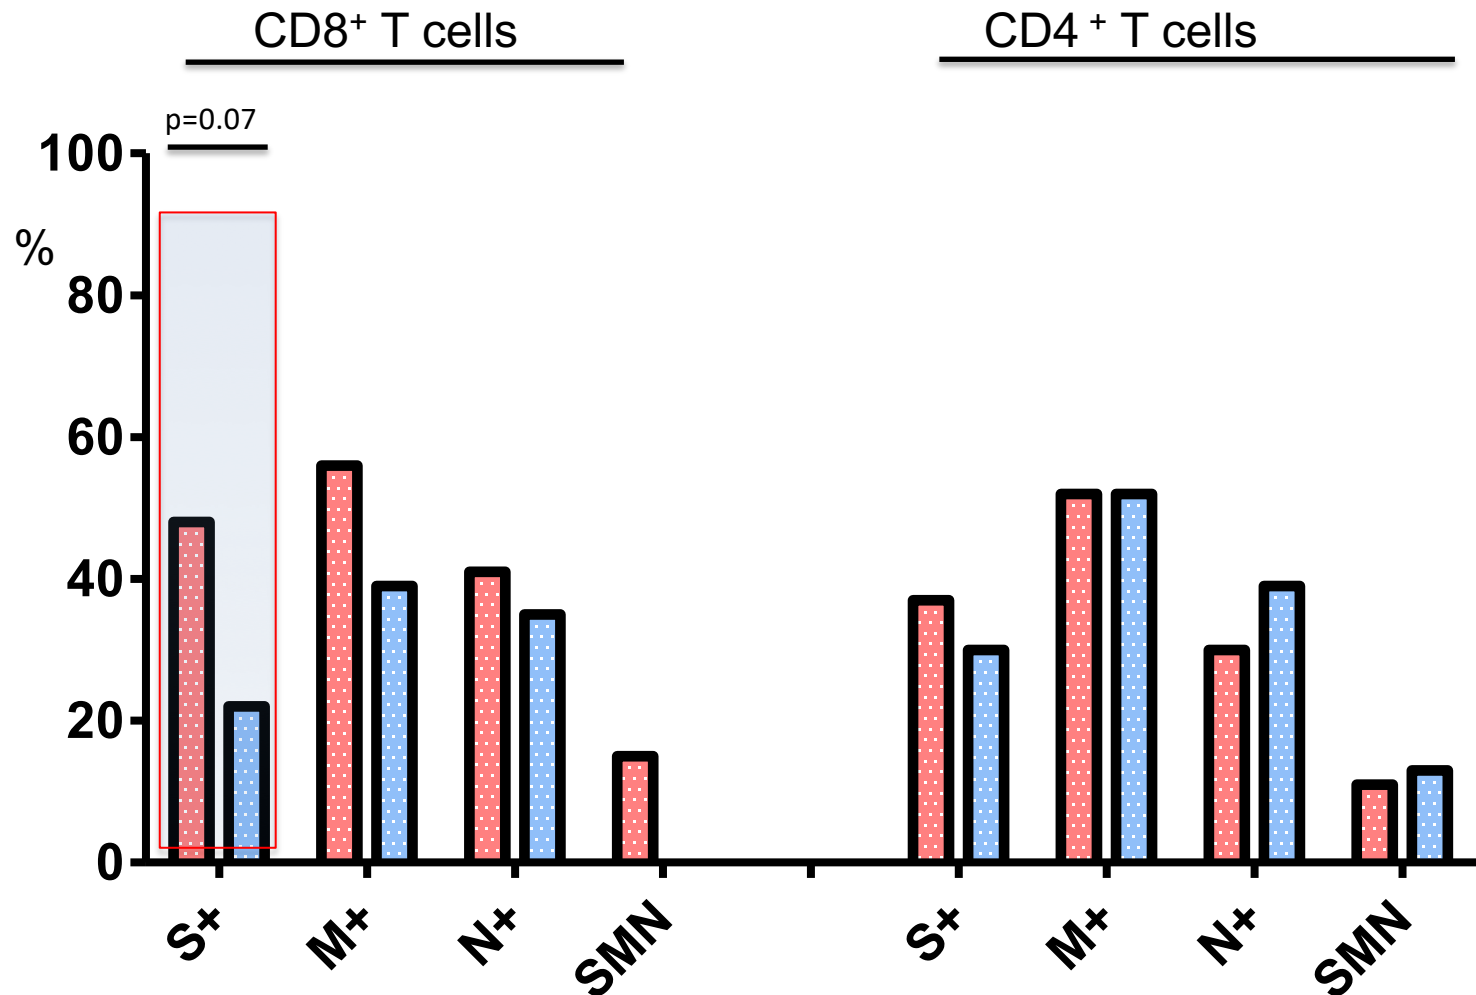

**Supplementary figure 1a.** Breadth of T-cell response toward different structural viral proteins (S, M, N) in convalescent (red bars) and HCWs with cross-reactive immunity (blue bars). SMN, response to the three viral proteins; S+, presence of response to protein S (at least); M+, presence of response to M; N+, response to N.



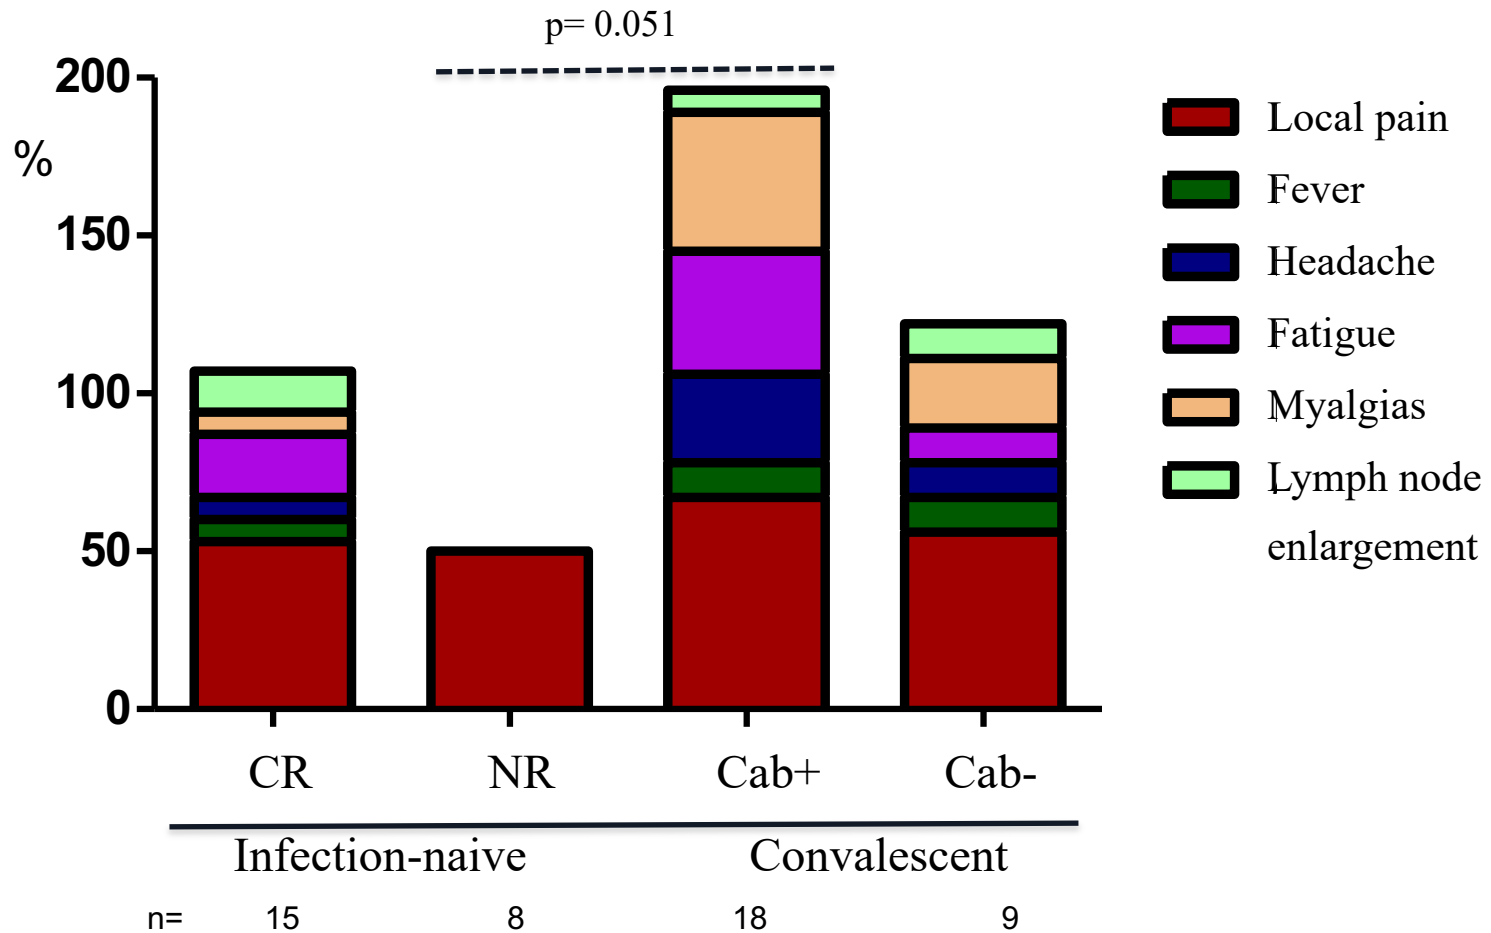

**Suppl Figure 2.** Cumulative percentage and type of adverse events after 1<sup>st</sup> dose of vaccination according to baseline immune status: cross-reactive immunity (CR), non-reactive (NR), convalescent with persistence of antibodies (Cab+) and recovered HCWs with loss of antibodies during follow up (Cab-). The number of individuals in each group is shown below the graphs.

## SARS-Cov-2 peptide S

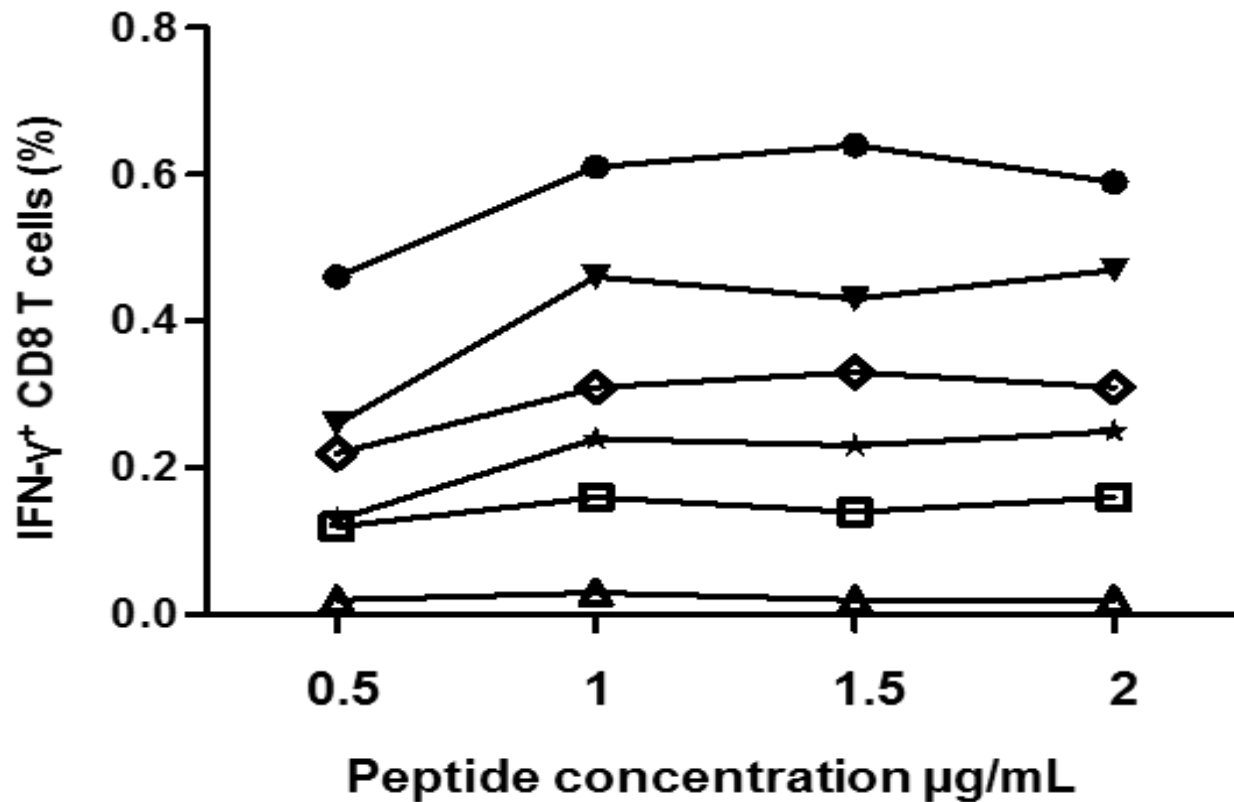

**Suppl Figure 3a.** Dose-response curves in six samples for peptide concentrations of 0.5, 1, 1.5, and 2  $\mu\text{g mL}^{-1}$  in SARS-CoV-2 peptide pool S. A concentration of 1  $\mu\text{g mL}^{-1}$  was chosen.

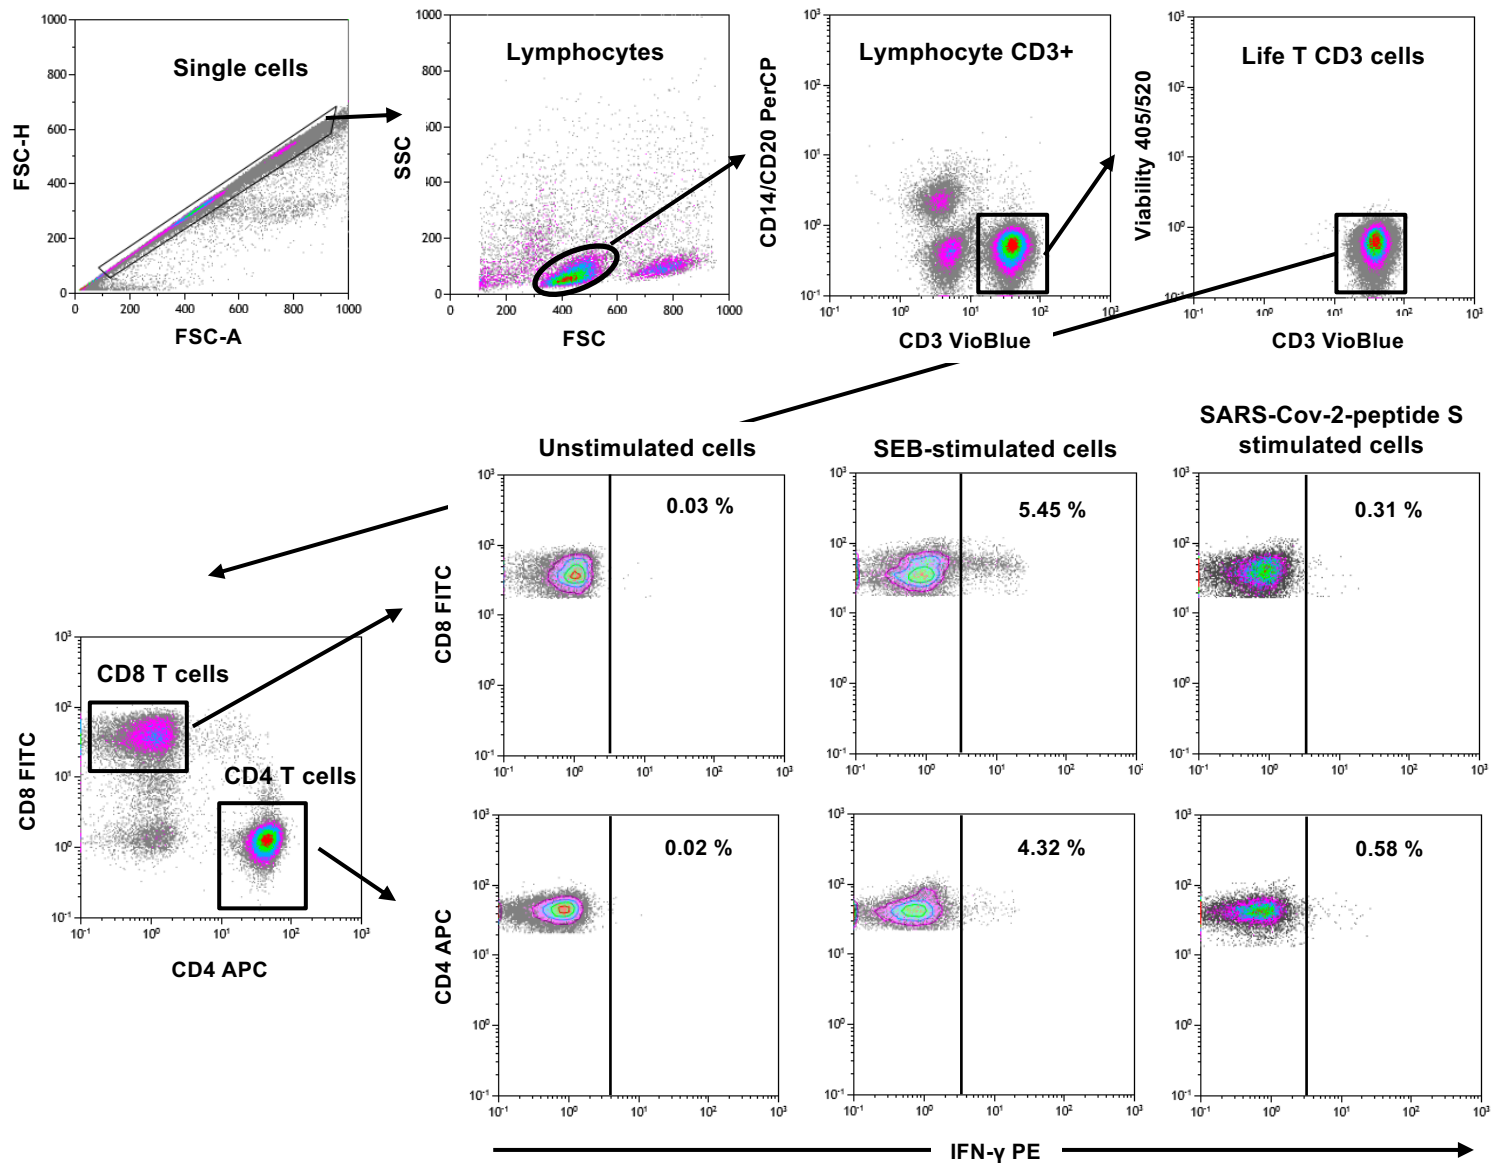

Supplementary figure 3b. Flow cytometry strategy
